# Supplementary material for: Crystal chemical models for the cancrinite-sodalite supergroup: the structure of a new 18-layer phase
Source: publisher site journal article supplement (doi:10.1515/zkri-2014-1819), 2015-04-14
Supplement: Supplementary file 1 [file Table4.doc]

| Site | Content | Site multiplicity | x | y | z | Ueq/Uiso |
| --- | --- | --- | --- | --- | --- | --- |
| Al01 | Al | 3 | 0.7487(5) | 0.0011(7) | 0.4999(2) | 0.012(1) |
| Si02 | Si | 3 | 0.2508(4) | 0.0004(6) | 0.5001(2) | 0.010(1) |
| Si11 | Si | 3 | 0.7523(5) | 0.0000(7) | 0.0006(2) | 0.023(1) |
| Al12 | Al | 3 | 0.2486(6) | 0.0018(8) | 0.0008(2) | 0.019(1) |
| Al21 | Al | 3 | 0.5830(6) | 0.9155(6) | 0.9458(2) | 0.016(2) |
| Si22 | Si | 3 | 0.4179(6) | 0.0857(6) | 0.0541(2) | 0.023(2) |
| Si23 | Si | 3 | 0.0847(5) | 0.4175(5) | 0.9458(2) | 0.013(1) |
| Al24 | Al | 3 | 0.9128(7) | 0.5801(7) | 0.0547(2) | 0.031(2) |
| Al31 | Al | 3 | 0.4129(5) | 0.0806(5) | 0.8915(2) | 0.012(1) |
| Si32 | Si | 3 | 0.5841(7) | 0.9167(6) | 0.1091(2) | 0.030(2) |
| Si33 | Si | 3 | 0.9188(5) | 0.5830(5) | 0.8916(2) | 0.013(1) |
| Al34 | Al | 3 | 0.0827(6) | 0.4145(6) | 0.1086(2) | 0.022(2) |
| Al41 | Al | 3 | 0.7484(5) | 0.0025(6) | 0.8352(2) | 0.011(1) |
| Si42 | Si | 3 | 0.2498(5) | 0.0006(6) | 0.1645(2) | 0.019(1) |
| Si43 | Si | 3 | 0.9997(5) | 0.2513(4) | 0.8355(2) | 0.008(1) |
| Al44 | Al | 3 | 0.0048(8) | 0.7507(7) | 0.1653(2) | 0.029(2) |
| Si51 | Si | 3 | 0.5857(4) | 0.9211(4) | 0.7804(1) | 0.008(1) |
| Al52 | Al | 3 | 0.4097(6) | 0.0840(6) | 0.2196(2) | 0.022(2) |
| Al53 | Al | 3 | 0.0839(4) | 0.4089(5) | 0.7807(1) | 0.005(1) |
| Si54 | Si | 3 | 0.9198(6) | 0.5834(6) | 0.2193(2) | 0.025(2) |
| Al61 | Al | 3 | 0.7463(5) | 0.9990(5) | 0.7239(2) | 0.007(1) |
| Si62 | Si | 3 | 0.2513(5) | 0.0013(6) | 0.2758(2) | 0.016(1) |
| Si63 | Si | 3 | 0.9990(5) | 0.2515(4) | 0.7245(1) | 0.006(1) |
| Al64 | Al | 3 | 0.0035(6) | 0.7472(6) | 0.2755(2) | 0.020(2) |
| Al71 | Al | 3 | 0.4084(5) | 0.0838(5) | 0.6672(2) | 0.010(1) |
| Si72 | Si | 3 | 0.5839(5) | 0.9215(5) | 0.3332(2) | 0.018(1) |
| Si73 | Si | 3 | 0.9205(5) | 0.5849(5) | 0.6669(1) | 0.009(1) |
| Al74 | Al | 3 | 0.0854(5) | 0.4075(5) | 0.3334(2) | 0.012(1) |
| Al81 | Al | 3 | 0.7459(5) | 0.0016(5) | 0.6119(2) | 0.009(1) |
| Si82 | Si | 3 | 0.2545(5) | 0.0040(4) | 0.3880(2) | 0.012(1) |
| Si83 | Si | 3 | 0.0015(5) | 0.2543(4) | 0.6114(2) | 0.009(1) |
| Al84 | Al | 3 | 0.0054(5) | 0.7467(5) | 0.3882(2) | 0.014(2) |
| Si91 | Si | 3 | 0.6638(4) | 0.0802(4) | 0.5569(1) | 0.008(1) |
| Al92 | Al | 3 | 0.3236(5) | 0.9149(5) | 0.4435(2) | 0.014(1) |
| Al93 | Al | 3 | 0.9163(5) | 0.3237(5) | 0.5571(1) | 0.008(1) |
| Si94 | Si | 3 | 0.0789(5) | 0.6631(5) | 0.4434(2) | 0.016(2) |
| O11 | O | 3 | 0.6457(11) | 0.9815(12) | 0.7507(3) | 0.013(3) |
| O12 | O | 3 | 0.3441(14) | 0.0221(14) | 0.2496(3) | 0.030(4) |
| O13 | O | 3 | 0.0200(13) | 0.3500(13) | 0.7488(3) | 0.016(4) |
| O14 | O | 3 | 0.9802(17) | 0.6440(17) | 0.2498(4) | 0.032(5) |
| O21 | O | 3 | 0.6546(17) | 0.9806(17) | 0.9754(4) | 0.052(5) |
| O22 | O | 3 | 0.3571(16) | 0.0344(14) | 0.0245(4) | 0.046(4) |
| O23 | O | 3 | 0.0133(15) | 0.3151(15) | 0.9700(4) | 0.039(4) |
| O24 | O | 3 | 0.9943(17) | 0.6902(17) | 0.0305(4) | 0.048(4) |
| O31 | O | 3 | 0.6718(12) | 0.0162(12) | 0.5279(3) | 0.012(3) |
| O32 | O | 3 | 0.3183(15) | 0.9798(15) | 0.4731(4) | 0.022(4) |
| O33 | O | 3 | 0.9801(14) | 0.3182(15) | 0.5251(3) | 0.027(4) |
| O34 | O | 3 | 0.0223(13) | 0.6700(14) | 0.4725(3) | 0.023(3) |
| O41 | O | 3 | 0.3310(12) | -0.0292(12) | 0.9152(3) | 0.023(3) |
| O42 | O | 3 | 0.6613(15) | 0.0159(15) | 0.0850(4) | 0.040(4) |
| O43 | O | 3 | 0.0031(18) | 0.6590(19) | 0.9184(5) | 0.051(5) |
| O44 | O | 3 | 0.0132(18) | 0.3505(17) | 0.0788(4) | 0.053(5) |
| O51 | O | 3 | 0.6601(13) | 0.9950(13) | 0.5839(3) | 0.018(3) |
| O52 | O | 3 | 0.3338(18) | 0.0061(16) | 0.4148(4) | 0.033(4) |
| O53 | O | 3 | 0.0046(14) | 0.3323(14) | 0.5843(3) | 0.016(3) |
| O54 | O | 3 | 0.0006(13) | 0.6612(14) | 0.4171(3) | 0.016(3) |
| O61 | O | 3 | 0.3300(12) | 0.0157(12) | 0.6958(3) | 0.015(3) |
| O62 | O | 3 | 0.6569(13) | 0.9826(12) | 0.3045(3) | 0.018(3) |
| O63 | O | 3 | 0.9814(13) | 0.6605(15) | 0.6956(4) | 0.017(3) |
| O64 | O | 3 | 0.0136(18) | 0.3351(18) | 0.3024(4) | 0.041(5) |
| O71 | O | 3 | 0.3460(15) | 0.0230(14) | 0.8595(4) | 0.033(4) |
| O72 | O | 3 | 0.6450(20) | 0.9727(19) | 0.1387(5) | 0.055(5) |
| O73 | O | 3 | 0.9801(14) | 0.6531(15) | 0.8619(3) | 0.018(4) |
| O74 | O | 3 | 0.0160(19) | 0.3300(20) | 0.1367(5) | 0.048(6) |
| O81 | O | 3 | 0.6704(14) | 0.0028(14) | 0.8066(4) | 0.025(3) |
| O82 | O | 3 | 0.3235(19) | 0.9970(20) | 0.1900(4) | 0.049(5) |
| O83 | O | 3 | 0.9972(12) | 0.3146(11) | 0.8056(3) | 0.017(3) |
| O84 | O | 3 | 0.0001(15) | 0.6721(15) | 0.1948(4) | 0.027(3) |
| O91 | O | 3 | 0.6602(11) | 0.9978(11) | 0.6401(2) | 0.004(2) |
| O92 | O | 3 | 0.3316(16) | 0.0033(15) | 0.3614(4) | 0.028(4) |
| O93 | O | 3 | 0.0014(13) | 0.3343(14) | 0.6381(3) | 0.020(3) |
| O94 | O | 3 | 0.0033(15) | 0.6548(15) | 0.3615(3) | 0.027(4) |
| O101 | O | 3 | 0.7671(13) | 0.2170(13) | 0.5606(3) | 0.021(3) |
| O102 | O | 3 | 0.2181(15) | 0.7688(15) | 0.4382(3) | 0.025(3) |
| O111 | O | 3 | 0.8849(17) | 0.1201(17) | 0.4930(3) | 0.037(3) |
| O112 | O | 3 | 0.1258(17) | 0.8850(17) | 0.5048(3) | 0.026(3) |
| O121 | O | 3 | 0.4174(9) | 0.2133(15) | 0.8986(2) | 0.026(2) |
| O122 | O | 3 | 0.5572(13) | 0.7810(20) | 0.1029(3) | 0.057(4) |
| O131 | O | 3 | 0.2306(13) | 0.4486(9) | 0.7835(2) | 0.017(2) |
| O132 | O | 3 | 0.4497(13) | 0.2348(17) | 0.2159(3) | 0.037(3) |
| O141 | O | 3 | 0.8950(16) | 0.1120(15) | 0.8338(3) | 0.029(3) |
| O142 | O | 3 | 0.1141(18) | 0.9005(19) | 0.1650(3) | 0.038(3) |
| O151 | O | 3 | 0.8815(14) | 0.1262(14) | 0.7311(2) | 0.015(2) |
| O152 | O | 3 | 0.1210(20) | 0.8790(20) | 0.2688(3) | 0.042(3) |
| O161 | O | 3 | 0.7565(10) | 0.8741(16) | 0.6134(3) | 0.022(2) |
| O162 | O | 3 | 0.2427(11) | 0.1183(18) | 0.3879(3) | 0.033(3) |
| O171 | O | 3 | 0.5343(14) | 0.0725(8) | 0.5560(2) | 0.016(2) |
| O172 | O | 3 | 0.4561(19) | 0.9185(12) | 0.4425(3) | 0.038(3) |
| O181 | O | 3 | 0.4587(17) | 0.9225(10) | 0.7832(2) | 0.025(3) |
| O182 | O | 3 | 0.5424(18) | 0.0864(11) | 0.2160(3) | 0.032(3) |
| O191 | O | 3 | 0.7453(9) | 0.8734(14) | 0.8404(2) | 0.016(2) |
| O192 | O | 3 | 0.2511(15) | 0.1170(20) | 0.1587(4) | 0.051(4) |
| O201 | O | 3 | 0.7686(8) | 0.8832(13) | 0.7212(2) | 0.013(2) |
| O202 | O | 3 | 0.2336(13) | 0.1110(20) | 0.2794(3) | 0.045(4) |
| O211 | O | 3 | 0.4497(10) | 0.2300(14) | 0.6635(2) | 0.019(3) |
| O212 | O | 3 | 0.5508(10) | 0.7846(13) | 0.3380(3) | 0.024(3) |
| O221 | O | 3 | 0.8908(13) | 0.1191(13) | 0.6124(2) | 0.010(2) |
| O222 | O | 3 | 0.1219(17) | 0.8876(17) | 0.3893(3) | 0.035(3) |
| O231 | O | 3 | 0.5356(14) | 0.0765(9) | 0.6689(2) | 0.019(2) |
| O232 | O | 3 | 0.4622(19) | 0.9273(12) | 0.3313(3) | 0.036(3) |
| O241 | O | 3 | 0.5603(16) | 0.1129(10) | 0.8898(3) | 0.029(3) |
| O242 | O | 3 | 0.4490(30) | 0.9005(17) | 0.1122(5) | 0.075(5) |
| O251 | O | 3 | 0.5429(9) | 0.7672(16) | 0.9447(2) | 0.029(2) |
| O252 | O | 3 | 0.4208(14) | 0.2050(30) | 0.0630(4) | 0.061(4) |
| O261 | O | 3 | 0.4595(16) | 0.9298(10) | 0.9547(2) | 0.033(2) |
| O262 | O | 3 | 0.5530(20) | 0.1111(14) | 0.0527(4) | 0.063(4) |
| O271 | O | 3 | 0.7498(11) | 0.8760(20) | 0.0095(3) | 0.049(3) |
| O272 | O | 3 | 0.2109(13) | 0.1100(20) | 0.9991(3) | 0.059(3) |
| Na1 | Na | 1 | 0.3333 | 0.6667 | 0.9635(3) | 0.048(3) |
| Ca2 | Ca | 1 | 0.3333 | 0.6667 | 0.7922(1) | 0.020(1) |
| Ca3 | 0.7 Ca | 1 | 0.3333 | 0.6667 | 0.4245(2) | 0.025(2) |
| Ca4 | 0.7 Ca | 1 | 0.3333 | 0.6667 | 0.3520(2) | 0.022(2) |
| Ca4B | 0.3 Ca | 1 | 0.3333 | 0.6667 | 0.3341(4) | 0.022(2) |
| Ca5 | Ca | 1 | 0.3333 | 0.6667 | 0.1001(3) | 0.064(3) |
| Ca6 | Ca | 1 | 0.6667 | 0.3333 | 0.8994(2) | 0.033(2) |
| Ca7 | 0.67 Ca | 1 | 0.6667 | 0.3333 | 0.6499(2) | 0.018(1) |
| Ca7B | 0.33 Ca | 1 | 0.6667 | 0.3333 | 0.6436(4) | 0.018(1) |
| Ca8 | 0.67 Ca | 1 | 0.6667 | 0.3333 | 0.5763(2) | 0.020(1) |
| Ca8B | 0.33 Ca | 1 | 0.6667 | 0.3333 | 0.5634(4) | 0.020(3) |
| Ca9 | Ca | 1 | 0.6667 | 0.3333 | 0.2076(2) | 0.037(2) |
| Na10 | Na | 1 | 0.6667 | 0.3333 | 0.0751(4) | 0.066(4) |
| K1 | K | 3 | 0.5633(4) | 0.7814(5) | 0.6675(1) | 0.036(1) |
| K2 | 0.75 K | 3 | 0.2192(6) | 0.4391(4) | 0.5539(1) | 0.021(1) |
| K3 | 0.75 K | 3 | 0.2195(7) | 0.7809(7) | 0.2245(1) | 0.030(1) |
| K4 | 0.75 K | 3 | 0.7805(6) | 0.2201(6) | 0.7760(1) | 0.016(1) |
| K5 | 0.75 K | 3 | 0.7825(6) | 0.5636(4) | 0.4461(1) | 0.022(1) |
| K6 | K | 3 | 0.7816(7) | 0.5642(5) | 0.3319(1) | 0.049(1) |
| Na1A | 0.5 Na | 3 | 0.2133(17) | 0.7862(17) | 0.8816(2) | 0.026(2) |
| Na1B | 0.5 Na | 3 | 0.1699(18) | 0.8276(18) | 0.8888(3) | 0.026(2) |
| Na2 | Na | 3 | 0.5060(7) | 0.0200(6) | 0.8332(1) | 0.018(1) |
| Ca13 | 0.77(2) Ca | 3 | 0.0010(4) | 0.4971(5) | 0.7215(1) | 0.019(2) |
| Ca14 | 0.77(2) Ca | 3 | 0.4893(6) | 0.9864(4) | 0.6111(1) | 0.021(2) |
| Ca15 | 0.83(1) Ca | 3 | 0.4975(5) | 0.0008(5) | 0.4999(1) | 0.025(1) |
| Ca16 | 0.89(3) Ca | 3 | 0.5025(6) | 0.0121(4) | 0.3886(1) | 0.032(2) |
| Ca17 | 0.82(3) Ca | 3 | 0.4978(6) | 0.0010(5) | 0.2779(1) | 0.032(2) |
| Na8 | Na | 3 | 0.0274(9) | 0.5117(10) | 0.1671(2) | 0.044(2) |
| N10A | 0.25 Na | 3 | 0.5370(30) | 0.0625(17) | 0.9956(5) | 0.019(2) |
| N10B | 0.5 Na | 3 | 0.4968(14) | 0.9942(12) | 0.0008(3) | 0.019(2) |
| N10C | 0.25 Na | 3 | 0.4600(30) | 0.9087(17) | 0.0074(4) | 0.019(2) |
| Na11 | Na | 1 | 0.0000 | 0.0000 | 0.0181(4) | 0.075(5) |
| Na12 | Na | 1 | 0.0000 | 0.0000 | 0.8424(2) | 0.015(2) |
| Na13 | Na | 1 | 0.0000 | 0.0000 | 0.7312(5) | 0.069(6) |
| Na14 | Na | 1 | 0.0000 | 0.0000 | 0.6138(4) | 0.047(4) |
| Na15 | Na | 1 | 0.0000 | 0.0000 | 0.5017(10) | 0.109(6) |
| Na16A | 0.25 Na | 1 | 0.0000 | 0.0000 | 0.3909(15) | 0.027(4) |
| Na16B | 0.5 Na | 1 | 0.0000 | 0.0000 | 0.3865(8) | 0.027(4) |
| Na16C | 0.25 Na | 1 | 0.0000 | 0.0000 | 0.4008(10) | 0.027(4) |
| Na17 | Na | 1 | 0.0000 | 0.0000 | 0.2745(5) | 0.075(5) |
| Na18 | 0.63 Na | 1 | 0.0000 | 0.0000 | 0.1462(3) | 0.023(2) |
| Na18B | 0.37 Na | 1 | 0.0000 | 0.0000 | 0.1693(6) | 0.023(2) |
| Na19 | 0.55 Na | 3 | 0.8459(13) | 0.1572(13) | 0.9442(2) | 0.016(2) |
| Na19B | 0.45 Na | 3 | 0.8763(17) | 0.1266(17) | 0.9389(2) | 0.016(2) |
| Na21 | 0.40 Na | 3 | 0.8630(20) | 0.1290(20) | 0.1044(3) | 0.034(2) |
| Na21B | 0.60 Na | 3 | 0.8347(17) | 0.1608(18) | 0.1105(3) | 0.034(2) |
| Na22 | 0.50 Na | 3 | 0.2010(20) | 0.7950(20) | 0.0483(3) | 0.051(3) |
| Na22B | 0.50 Na | 3 | 0.1690(30) | 0.8290(30) | 0.0541(4) | 0.051(3) |
| S1 | S | 1 | 0.3333 | 0.6667 | 0.8559(6) | 0.082(7) |
| O1B | O | 3 | 0.2700(50) | 0.5460(30) | 0.8755(6) | 0.060(6) |
| S2 | S | 1 | 0.3333 | 0.6667 | 0.7154(2) | 0.020(2) |
| O2A | O | 1 | 0.3333 | 0.6667 | 0.7453(11) | 0.098(13) |
| O2B | O | 3 | 0.3950(20) | 0.6081(19) | 0.7032(3) | 0.036(3) |
| S3 | S | 1 | 0.3333 | 0.6667 | 0.6127(3) | 0.047(2) |
| O3A | O | 1 | 0.3333 | 0.6667 | 0.5770(20) | 0.210(30) |
| O3C | 0.5 O | 3 | 0.2202(19) | 0.6090(30) | 0.5920(5) | 0.039(4) |
| O3B | 0.5 O | 3 | 0.2245(19) | 0.6070(30) | 0.6261(5) | 0.039(4) |
| S4 | S | 1 | 0.3333 | 0.6667 | 0.5058(2) | 0.026(2) |
| O4A | O | 1 | 0.3333 | 0.6667 | 0.4737(8) | 0.065(8) |
| O4B | O | 3 | 0.4000(20) | 0.6053(19) | 0.5151(3) | 0.040(3) |
| S5 | S | 1 | 0.3333 | 0.6667 | 0.2722(2) | 0.034(2) |
| O5A | O | 1 | 0.3333 | 0.6667 | 0.3014(11) | 0.102(13) |
| O5B | O | 3 | 0.3960(20) | 0.6070(20) | 0.2612(4) | 0.056(4) |
| S6 | S | 1 | 0.3333 | 0.6667 | 0.1782(2) | 0.044(2) |
| O6B | O | 3 | 0.4048(19) | 0.6148(19) | 0.1885(4) | 0.056(4) |
| S7 | 0.33 S | 3 | 0.6368(18) | 0.3310(30) | -0.0317(4) | 0.023(6) |
| O7A | 0.6 O | 1 | 0.6667 | 0.3333 | 0.9400(30) | 0.190(50) |
| O7B | 0.6 O | 3 | 0.7930(40) | 0.3920(70) | 0.9873(8) | 0.0103(10) |
| S8 | S | 1 | 0.0000 | 0.0000 | 0.9126(7) | 0.081(7) |
| O8B | O | 3 | 0.9260(50) | 0.0520(50) | 0.9312(9) | 0.086(12) |
| S9 | S | 1 | 0.6667 | 0.3333 | 0.8225(2) | 0.032(2) |
| O9A | O | 1 | 0.6667 | 0.3333 | 0.8541(5) | 0.060(6) |
| O9B | O | 3 | 0.6100(30) | 0.2127(19) | 0.8132(4) | 0.071(5) |
| S10 | S | 1 | 0.6667 | 0.3333 | 0.7283(2) | 0.032(2) |
| O10A | O | 1 | 0.6667 | 0.3333 | 0.6955(5) | 0.030(5) |
| O10B | O | 3 | 0.6100(20) | 0.2086(14) | 0.7373(3) | 0.050(4) |
| S11 | S | 1 | 0.6667 | 0.3333 | 0.4947(2) | 0.034(2) |
| O11A | O | 1 | 0.6667 | 0.3333 | 0.5254(6) | 0.047(7) |
| O11B | O | 3 | 0.6100(20) | 0.2113(14) | 0.4823(3) | 0.048(4) |
| S12 | S | 1 | 0.6667 | 0.3333 | 0.3902(2) | 0.049(2) |
| O12B | O | 3 | 0.6150(40) | 0.2220(20) | 0.3922(6) | 0.042(5) |
| S13 | S | 1 | 0.6667 | 0.3333 | 0.2863(2) | 0.033(2) |
| O13A | O | 1 | 0.6667 | 0.3333 | 12560(6) | 0.041(5) |
| O13B | O | 3 | 0.6080(20) | 0.2077(14) | 0.2948(4) | 0.048(3) |
| S14 | 0.33 S | 3 | 0.6680(10) | 0.2951(11) | 0.1423(3) | 0.032(3) |
| O14B | 0.67 O | 3 | 0.7940(20) | 0.3950(40) | 0.1607(5) | 0.039(5) |
| O14C | 0.67 O | 3 | 0.8070(30) | 0.1910(30) | 0.1156(4) | 0.016(4) |
| S15 | 0.5 S | 1 | 0.3333 | 0.6667 | 0.0510(20) | 0.170(30) |
| O15A | 0.5 O | 3 | 0.2664(30) | 0.6886(16) | 0.0298(5) | 0.025(6) |
| S16 | 0.5 S | 1 | 0.0000 | 0.0000 | 0.0855(8) | 0.077(8) |
| O16A | 0.5 O | 3 | 0.5990(80) | 0.7680(80) | -0.1700(30) | 0.190(30) |
| O16B | 0.5 O | 3 | 0.1270(40) | 0.0910(40) | 0.1022(11) | 0.082(13) |
| Cl1 | 0.333 Cl | 3 | 0.4101(18) | 0.5991(18) | 0.3887(3) | 0.025(2) |
| Cl2 | 0.333 Cl | 3 | 0.6039(18) | 0.4129(18) | 0.6131(3) | 0.031(3) |
| W3 | H2O | 1 | 0.0000 | 0.0000 | 0.7832(18) | 0.128(14) |
| W4 | H2O | 1 | 0.0000 | 0.0000 | 0.6680(11) | 0.100(12) |
| W5 | H2O | 1 | 0.0000 | 0.0000 | 0.5569(11) | 0.095(10) |
| W6 | H2O | 1 | 0.0000 | 0.0000 | 0.4452(12) | 0.098(13) |
| W7 | H2O | 1 | 0.0000 | 0.0000 | 0.3293(19) | 0.137(13) |
| W8 | H2O | 1 | 0.0000 | 0.0000 | 0.2159(8) | 0.064(9) |
