# Supplementary material for: Crystal chemical models for the cancrinite-sodalite supergroup: the structure of a new 18-layer phase
Source: publisher site journal article supplement (doi:10.1515/zkri-2014-1819), 2015-04-14
Supplement: Supplementary file 2 [file Table5.doc]

| Si02 | - O112 | 1.57(2) | Si11 | - O272 | 1.60(3) | Si22 | - O252 | 1.58(3) |
| --- | --- | --- | --- | --- | --- | --- | --- | --- |
|  | - O33 | 1.572(18) |  | - O24 | 1.62(2) |  | - O22 | 1.59(2) |
|  | - O111 | 1.63(2) |  | - O271 | 1.63(3) |  | - O262 | 1.61(3) |
|  | - O32 | 1.651(19) |  | - O21 | 1.67(2) |  | - O44 | 1.67(2) |
|  | **average** | **1.61** |  | **average** | **1.63** |  | **average** | **1.61** |
|  |  |  |  |  |  |  |  |  |
| Si23 | - O261 | 1.61(2) | Si32 | - O72 | 1.61(3) | Si33 | - O241 | 1.59(2) |
|  | - O251 | 1.61(2) |  | - O42 | 1.64(2) |  | - O121 | 1.618(19) |
|  | - O41 | 1.631(15) |  | - O122 | 1.64(3) |  | - O43 | 1.65(2) |
|  | - O23 | 1.649(19) |  | - O242 | 1.66(4) |  | - O73 | 1.656(19) |
|  | **average** | **1.62** |  | **average** | **1.64** |  | **average** | **1.63** |
|  |  |  |  |  |  |  |  |  |
| Si42 | - O192 | 1.52(3) | Si43 | - O71 | 1.590(19) | Si51 | - O11 | 1.616(15) |
|  | - O82 | 1.56(2) |  | - O141 | 1.62(2) |  | - O131 | 1.627(16) |
|  | - O142 | 1.57(2) |  | - O83 | 1.654(15) |  | - O81 | 1.651(18) |
|  | - O74 | 1.64(2) |  | - O191 | 1.652(18) |  | - O181 | 1.65(2) |
|  | **average** | **1.57** |  | **average** | **1.63** |  | **average** | **1.64** |
|  |  |  |  |  |  |  |  |  |
| Si54 | - O132 | 1.58(2) | Si62 | - O202 | 1.55(2) | Si63 | - O151 | 1.600(18) |
|  | - O84 | 1.60(2) |  | - O64 | 1.63(2) |  | - O13 | 1.642(17) |
|  | - O182 | 1.61(2) |  | - O152 | 1.66(3) |  | - O201 | 1.644(17) |
|  | - O14 | 1.66(2) |  | - O12 | 1.659(18) |  | - O61 | 1.649(16) |
|  | **average** | **1.61** |  | **average** | **1.62** |  | **average** | **1.63** |
|  |  |  |  |  |  |  |  |  |
| Si72 | - O212 | 1.612(17) | Si73 | - O231 | 1.645(18) | Si82 | - O162 | 1.56(2) |
|  | - O232 | 1.61(3) |  | - O63 | 1.639(18) |  | - O222 | 1.62(2) |
|  | - O94 | 1.639(19) |  | - O91 | 1.643(14) |  | - O92 | 1.617(19) |
|  | - O62 | 1.627(16) |  | - O211 | 1.641(18) |  | - O52 | 1.63(2) |
|  | **average** | **1.62** |  | **average** | **1.64** |  | **average** | **1.61** |
|  |  |  |  |  |  |  |  |  |
| Si83 | - O161 | 1.58(2) | Si91 | - O101 | 1.603(17) | Si94 | - O34 | 1.592(17) |
|  | - O221 | 1.611(17) |  | - O171 | 1.624(18) |  | - O54 | 1.607(17) |
|  | - O53 | 1.630(17) |  | - O31 | 1.640(14) |  | - O102 | 1.64(2) |
|  | - O93 | 1.641(17) |  | - O51 | 1.682(16) |  | - O172 | 1.64(3) |
|  | **average** | **1.62** |  | **average** | **1.64** |  | **average** | **1.62** |
|  |  |  |  |  |  |  |  |  |
| Al01 | - O111 | 1.69(2) | Al12 | - O23 | 1.68(2) | Al21 | - O439 | 1.65(2) |
|  | - O112 | 1.72(2) |  | - O22 | 1.68(2) |  | - O21 | 1.67(2) |
|  | - O31 | 1.736(16) |  | - O271 | 1.69(3) |  | - O251 | 1.72(2) |
|  | - O34 | 1.764(18) |  | - O272 | 1.69(3) |  | - O261 | 1.74(2) |
|  | **average** | **1.73** |  | **average** | **1.69** |  | **average** | **1.70** |
|  |  |  |  |  |  |  |  |  |
| Al24 | - O262 | 1.65(3) | Al31 | - O241 | 1.73(2) | Al34 | - O242 | 1.64(4) |
|  | - O252 | 1.70(3) |  | - O41 | 1.707(16) |  | - O44 | 1.67(2) |
|  | - O42 | 1.70(2) |  | - O121 | 1.718(19) |  | - O74 | 1.67(3) |
|  | - O24 | 1.72(2) |  | - O71 | 1.730(19) |  | - O122 | 1.69(3) |
|  | **average** | **1.69** |  | **average** | **1.72** |  | **average** | **1.67** |
|  |  |  |  |  |  |  |  |  |
| Al41 | - O191 | 1.665(18) | Al44 | - O72 | 1.73(3) | Al52 | - O12 | 1.651(18) |
|  | - O73 | 1.688(18) |  | - O142 | 1.73(3) |  | - O182 | 1.71(2) |
|  | - O141 | 1.70(2) |  | - O84 | 1.72(2) |  | - O132 | 1.75(2) |
|  | - O81 | 1.700(19) |  | - O192 | 1.80(3) |  | - O82 | 1.80(2) |
|  | **average** | **1.69** |  | **average** | **1.74** |  | **average** | **1.73** |
|  |  |  |  |  |  |  |  |  |
| Al53 | - O83 | 1.670(16) | Al61 | - O201 | 1.662(17) | Al64 | - O152 | 1.65(3) |
|  | - O181 | 1.69(2) |  | - O63 | 1.697(19) |  | - O14 | 1.72(2) |
|  | - O131 | 1.700(16) |  | - O151 | 1.730(18) |  | - O62 | 1.735(17) |
|  | - O13 | 1.720(17) |  | - O11 | 1.756(15) |  | - O202 | 1.77(2) |
|  | **average** | **1.70** |  | **average** | **1.71** |  | **average** | **1.72** |
|  |  |  |  |  |  |  |  |  |
| Al71 | - O61 | 1.669(16) | Al74 | - O212 | 1.725(17) | Al81 | - O161 | 1.72(2) |
|  | - O211 | 1.694(18) |  | - O92 | 1.72(2) |  | - O91 | 1.727(15) |
|  | - O231 | 1.693(18) |  | - O232 | 1.74(2) |  | - O51 | 1.712(17) |
|  | - O93 | 1.736(17) |  | - O64 | 1.75(2) |  | - O221 | 1.720(17) |
|  | **average** | **1.70** |  | **average** | **1.73** |  | **average** | **1.72** |
|  |  |  |  |  |  |  |  |  |
| Al84 | - O222 | 1.68(2) | Al92 | - O32 | 1.664(19) | Al93 | - O53 | 1.694(17) |
|  | - O94 | 1.731(18) |  | - O172 | 1.69(3) |  | - O171 | 1.715(17) |
|  | - O54 | 1.749(17) |  | - O102 | 1.70(2) |  | - O101 | 1.726(16) |
|  | - O162 | 1.75(2) |  | - O52 | 1.767(19) |  | - O33 | 1.758(18) |
|  | **average** | **1.73** |  | **average** | **1.70** |  | **average** | **1.72** |
|  |  |  |  |  |  |  |  |  |
