# Supplementary material for: Crystal chemical models for the cancrinite-sodalite supergroup: the structure of a new 18-layer phase
Source: publisher site journal article supplement (doi:10.1515/zkri-2014-1819), 2015-04-14
Supplement: Supplementary file 3 [file Table5B.doc]

| Na1 | O251 | 2.510(12) | Ca2 | O2A | 2.24(5) | Ca3 | Cl1 | 2.350(15) | Ca4 | Cl1 | 2.386(15) |
| --- | --- | --- | --- | --- | --- | --- | --- | --- | --- | --- | --- |
|  | O251 | 2.510(13) |  | O131 | 2.473(10) |  | Cl1 | 2.350(15) |  | Cl1 | 2.386(15) |
|  | O261 | 2.972(11) |  | O131 | 2.473(11) |  | Cl1 | 2.350(15) |  | Cl1 | 2.386(15) |
|  | O261 | 2.972(11) |  | O131 | 2.473(11) |  | O4A | 2.35(4) |  | O5A | 2.42(5) |
|  |  |  |  | O181 | 2.891(11) |  | O102 | 2.517(12) |  | O212 | 2.522(12) |
|  |  |  |  | O181 | 2.891(11) |  | O102 | 2.517(13) |  | O212 | 2.522(12) |
|  |  |  |  |  |  |  | O172 | 2.943(14) |  | O232 | 3.076(15) |
|  |  |  |  |  |  |  | O172 | 2.943(13) |  | O232 | 3.076(14) |
|  |  |  |  |  |  |  |  |  |  |  |  |
| Ca4B | O212 | 2.440(11) | Ca5 | O122 | 2.505(15) | Ca6 | O9A | 2.16(3) | Ca7 | O10A | 2.18(2) |
|  | O212 | 2.440(12) |  | O122 | 2.505(15) |  | O241 | 2.506(12) |  | Cl2 | 2.375(16) |
|  | O232 | 2.916(14) |  | O242 | 2.68(2) |  | O241 | 2.506(11) |  | Cl2 | 2.375(16) |
|  | O232 | 2.916(13) |  | O242 | 2.676(19) |  | O121 | 2.787(10) |  | Cl2 | 2.375(16) |
|  | Cl1 | 3.07(2) |  |  |  |  | O121 | 2.787(11) |  | O211 | 2.511(11) |
|  | Cl1 | 3.07(2) |  |  |  |  |  |  |  | O211 | 2.511(11) |
|  |  |  |  |  |  |  |  |  |  | O231 | 3.011(11) |
|  |  |  |  |  |  |  |  |  |  | O231 | 3.011(11) |
|  |  |  |  |  |  |  |  |  |  |  |  |
| Ca7B | Cl2 | 2.16(2) | Ca8 | Cl2 | 2.373(16) | Ca8B | O101 | 2.428(11) | Ca9 | O13A | 2.32(3) |
|  | Cl2 | 2.16(2) |  | Cl2 | 2.373(16) |  | O101 | 2.428(12) |  | O132 | 2.460(14) |
|  | Cl2 | 2.16(2) |  | Cl2 | 2.373(16) |  | Cl2 | 2.86(2) |  | O132 | 2.460(15) |
|  | O10A | 2.48(3) |  | O11A | 2.44(3) |  | Cl2 | 2.86(2) |  | O14B | 2.66(2) |
|  | O211 | 2.605(13) |  | O101 | 2.539(12) |  | Cl2 | 2.86(2) |  | O14B | 2.66(2) |
|  | O211 | 2.605(13) |  | O101 | 2.539(12) |  | O171 | 2.936(10) |  | O14B | 2.66(2) |
|  | O231 | 3.115(13) |  | O171 | 3.073(10) |  | O171 | 2.936(10) |  | O182 | 2.788(12) |
|  | O231 | 3.115(13) |  | O171 | 3.073(10) |  |  |  |  | O182 | 2.788(12) |
|  |  |  |  |  |  |  |  |  |  |  |  |
| Na10 | O262 | 2.705(18) |  |  |  | K1 | O2B | 2.79(2) | K2 | O3A | 2.78(4) |
|  | O262 | 2.705(18) |  |  |  |  | O93 | 2.800(16) |  | O51 | 2.799(16) |
|  | O252 | 2.809(16) |  |  |  |  | O2B | 2.82(2) |  | O4B | 2.85(2) |
|  | O252 | 2.809(16) |  |  |  |  | O3B | 2.93(3) |  | O3C | 2.84(4) |
|  |  |  |  |  |  |  | O61 | 2.943(15) |  | O3C | 2.88(4) |
|  |  |  |  |  |  |  | O63 | 2.971(17) |  | O4B | 2.91(2) |
|  |  |  |  |  |  |  | O3B | 3.03(3) |  | O31 | 2.917(14) |
|  |  |  |  |  |  |  |  |  |  | O112 | 3.228(13) |
|  |  |  |  |  |  |  |  |  |  |  |  |
| K3 | O6B | 2.70(2) | K4 | O9B | 2.80(3) | K5 | O11B | 2.78(2) | K6 | O92 | 2.779(19) |
|  | O5B | 2.84(3) |  | O10B | 2.82(2) |  | O52 | 2.81(2) |  | O13B | 2.81(2) |
|  | O5B | 2.81(3) |  | O9B | 2.86(3) |  | O11B | 2.87(2) |  | O13B | 2.90(3) |
|  | O6B | 2.90(2) |  | O10B | 2.93(2) |  | O32 | 2.966(18) |  | O64 | 2.94(2) |
|  |  |  |  |  |  |  | O111 | 3.172(14) |  | O62 | 2.943(17) |
|  |  |  |  |  |  |  | O12B | 3.37(4) |  | O202 | 3.375(17) |
|  |  |  |  |  |  |  |  |  |  | O162 | 3.440(14) |
|  |  |  |  |  |  |  |  |  |  |  |  |
| Na1A | O16A | 2.53(12) | Na1B | O41 | 2.34(2) | Na2 | O9B | 2.36(2) | Ca13 | O13 | 2.415(17) |
|  | O41 | 2.64(2) |  | O1B | 2.37(3) |  | O71 | 2.434(19) |  | O10B | 2.463(17) |
|  | O191 | 2.752(15) |  | O191 | 2.511(17) |  | O73 | 2.555(18) |  | O11 | 2.483(14) |
|  | O71 | 2.85(2) |  | O71 | 2.78(3) |  | O83 | 2.678(15) |  | O2B | 2.531(15) |
|  |  |  |  | 016A | 2.93(12) |  | O241 | 2.897(14) |  | O63 | 2.565(18) |
|  |  |  |  | O251 | 2.965(18) |  |  |  |  | O61 | 2.571(15) |
|  |  |  |  |  |  |  |  |  |  | O231 | 2.659(12) |
|  |  |  |  |  |  |  |  |  |  | O181 | 3.071(13) |
|  |  |  |  |  |  |  |  |  |  |  |  |
| Ca14 | Cl2 | 2.289(15) | Ca15 | O4B | 2.418(16) | Ca16 | Cl1 | 2.247(14) | Ca17 | O14 | 2.43(2) |
|  | O93 | 2.467(17) |  | O34 | 2.480(17) |  | O12B | 2.36(3) |  | O13B | 2.450(18) |
|  | O3B | 2.46(2) |  | O33 | 2.498(17) |  | O94 | 2.406(18) |  | O64 | 2.48(2) |
|  | O3C | 2.48(2) |  | O11B | 2.499(18) |  | O52 | 2.48(2) |  | O5B | 2.505(19) |
|  | O53 | 2.499(17) |  | O32 | 2.537(18) |  | O92 | 2.51(2) |  | O62 | 2.527(16) |
|  | O231 | 2.941(12) |  | O31 | 2.539(15) |  | O54 | 2.526(17) |  | O12 | 2.525(18) |
|  |  |  |  | O171 | 2.796(12) |  | O172 | 2.780(16) |  | O232 | 2.684(16) |
|  |  |  |  | O172 | 2.897(16) |  | O232 | 2.897(15) |  | O182 | 3.109(15) |
|  |  |  |  |  |  |  |  |  |  |  |  |
| Na8 | O6B | 2.29(2) | Na10A | O22 | 2.57(4) | Na10B | O22 | 2.40(2) | Na10C | O15A | 2.61(4) |
|  | O72 | 2.48(2) |  | O262 | 2.78(3) |  | O7B | 2.46(4) |  | O22 | 2.69(4) |
|  | O82 | 2.50(2) |  | O23 | 2.95(4) |  | O262 | 2.80(2) |  | O15A | 2.83(4) |
|  | O14B | 2.63(2) |  | O24 | 3.00(4) |  | O23 | 2.88(2) |  | O24 | 2.87(4) |
|  | O182 | 2.660(16) |  |  |  |  | O24 | 2.87(2) |  |  |  |
|  | O74 | 2.70(3) |  |  |  |  |  |  |  |  |  |
|  | O242 | 2.75(2) |  |  |  |  |  |  |  |  |  |
|  |  |  |  |  |  |  |  |  |  |  |  |
| Na11 | O272 | 2.526(17) | Na12 | O141 | 2.460(13) | Na13 | W3 | 2.48(9) | Na14 | O221 | 2.553(9) |
|  | O272 | 2.526(17) |  | O141 | 2.460(12) |  | O201 | 2.631(10) |  | O221 | 2.553(9) |
|  | O271 | 2.826(13) |  | O191 | 2.848(10) |  | O201 | 2.631(10) |  | W4 | 2.59(6) |
|  | O271 | 2.826(13) |  | O191 | 2.848(10) |  | O151 | 2.736(10) |  | O161 | 2.722(11) |
|  |  |  |  | W3 | 2.83(9) |  | O151 | 2.736(10) |  | O161 | 2.722(11) |
|  |  |  |  |  |  |  | W4 | 3.02(6) |  | W5 | 2.72(6) |
|  |  |  |  |  |  |  |  |  |  |  |  |
| Na15 | W5 | 2.64(7) | Na16A | O222 | 2.620(14) | Na16B | O222 | 2.622(14) | Na16C | W6 | 2.12(8) |
|  | W6 | 2.70(8) |  | O222 | 2.620(13) |  | O222 | 2.622(13) |  | O222 | 2.676(17) |
|  | O111 | 2.662(15) |  | W6 | 2.60(9) |  | W7 | 2.73(10) |  | O222 | 2.676(17) |
|  | O111 | 2.662(14) |  | O162 | 2.716(14) |  | O162 | 2.713(13) |  | O162 | 2.782(17) |
|  | O112 | 2.696(12) |  | O162 | 2.716(13) |  | O162 | 2.713(13) |  | O162 | 2.782(17) |
|  | O112 | 2.696(12) |  | W7 | 2.94(12) |  | W6 | 2.81(7) |  |  |  |
|  | O112 | 2.696(11) |  |  |  |  |  |  |  |  |  |
|  |  |  |  |  |  |  |  |  |  |  |  |
| Na17 | O202 | 2.622(16) | Na18 | O142 | 2.553(16) | Na18B | W8 | 2.23(5) | Na19 | O8B | 2.16(4) |
|  | O202 | 2.622(15) |  | O142 | 2.553(16) |  | O142 | 2.397(15) |  | O121 | 2.483(14) |
|  | W7 | 2.62(10) |  | O16B | 2.56(5) |  | O142 | 2.397(15) |  | O43 | 2.60(3) |
|  | O152 | 2.717(15) |  | O16B | 2.56(5) |  | O192 | 2.854(19) |  | O272 | 2.853(19) |
|  | O152 | 2.717(15) |  | O16B | 2.56(5) |  | O192 | 2.854(18) |  | O41 | 2.86(2) |
|  | W8 | 2.80(5) |  | O192 | 2.871(18) |  |  |  |  |  |  |
|  |  |  |  | O192 | 2.871(17) |  |  |  | Na22 | O271 | 2.55(2) |
|  |  |  |  |  |  |  |  |  |  | O15A | 2.58(3) |
| Na19B | O43 | 2.66(3) | Na21 | O252 | 2.63(2) | Na21B | O16B | 2.28(5) |  | O44 | 2.65(3) |
|  | O121 | 2.685(15) |  | O192 | 2.60(3) |  | O192 | 2.46(2) |  | O122 | 2.64(2) |
|  | O41 | 2.88(2) |  | O74 | 2.80(3) |  | O252 | 2.50(2) |  |  |  |
|  | O272 | 2.910(19) |  | O44 | 2.80(3) |  | O74 | 2.59(3) | Na22B | O271 | 2.36(2) |
|  |  |  |  |  |  |  | O44 | 2.82(3) |  | O44 | 2.41(4) |
|  |  |  |  |  |  |  |  |  |  | O122 | 2.60(2) |
|  |  |  |  |  |  |  |  |  |  | O42 | 2.80(3) |
|  |  |  |  |  |  |  |  |  |  |  |  |
| S1 | O1B | 1.64(3) | S2 | O2A | 1.43(5) | S3 | O3B | 1.38(2) | S4 | O4B | 1.497(15) |
|  | O1B | 1.64(3) |  | O2B | 1.461(14) |  | O3B | 1.38(2) |  | O4B | 1.497(15) |
|  | O1B | 1.64(3) |  | O2B | 1.461(14) |  | O3B | 1.38(2) |  | O4B | 1.497(14) |
|  |  |  |  | O2B | 1.461(14) |  | O3C | 1.60(2) |  | O4A | 1.53(4) |
|  |  |  |  |  |  |  | O3C | 1.60(2) |  |  |  |
|  |  |  |  |  |  |  | O3C | 1.60(2) |  |  |  |
|  |  |  |  |  |  |  | O3A | 1.70(11) |  |  |  |
|  |  |  |  |  |  |  |  |  |  |  |  |
| S5 | O5A | 1.39(5) | S6 | O6B | 1.469(18) | S7 | O7A | 1.39(16) | S8 | O8B | 1.68(5) |
|  | O5B | 1.459(19) |  | O6B | 1.469(19) |  | O7B | 1.46(5) |  | O8B | 1.68(5) |
|  | O5B | 1.459(19) |  | O6B | 1.469(18) |  | O7B | 1.68(5) |  | O8B | 1.68(5) |
|  | O5B | 1.459(18) |  |  |  |  | O7B | 1.98(5) |  |  |  |
|  |  |  |  |  |  |  |  |  |  |  |  |
| S9 | O9B | 1.42(2) | S10 | O10B | 1.460(17) | S11 | O11A | 1.46(3) | S12 | O12B | 1.25(3) |
|  | O9B | 1.42(2) |  | O10B | 1.460(17) |  | O11B | 1.489(17) |  | O12B | 1.25(2) |
|  | O9B | 1.42(2) |  | O10B | 1.460(17) |  | O11B | 1.489(17) |  | O12B | 1.25(2) |
|  | O9A | 1.51(3) |  | O10A | 1.57(2) |  | O11B | 1.489(17) |  | O13A | 1.44(3) |
|  |  |  |  |  |  |  |  |  |  |  |  |
| S13 | O13B | 1.463(17) | S14 | O14B | 1.36(3) | S15 | O15A | 1.45(8) | S16 | O16B | 1.67(5) |
|  | O13B | 1.463(16) |  | O14B | 1.73(3) |  | O15A | 1.45(8) |  | O16B | 1.67(5) |
|  | O13B | 1.463(16) |  | O14B | 2.08(3) |  | O15A | 1.45(8) |  | O16B | 1.67(5) |
